# Supplementary material for: Three New Species of Absidia (Mucoromycota) from China Based on Phylogeny, Morphology and Physiology
Source: MDPI journal article supplement (doi:10.3390/d14020132), 2022-02-13
Supplement: s1 [file s1]

1a

0.3

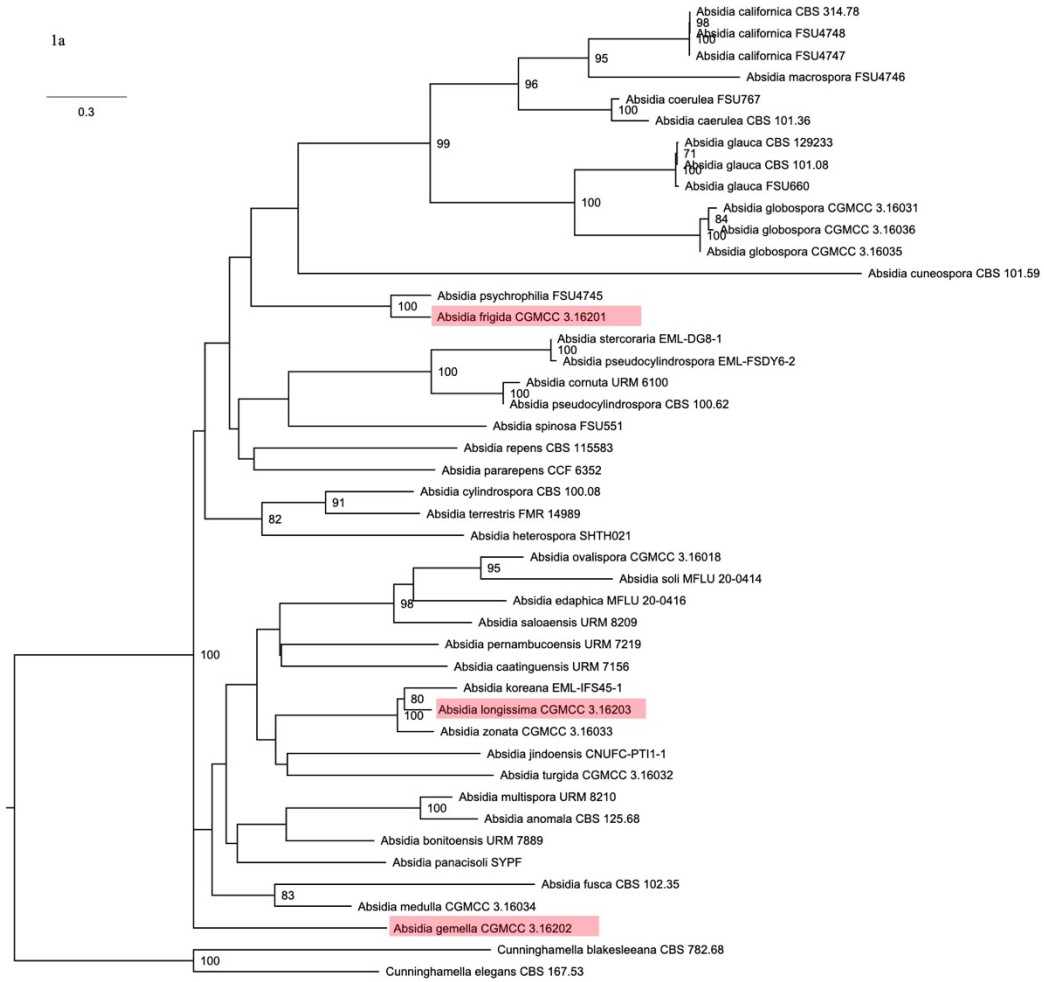

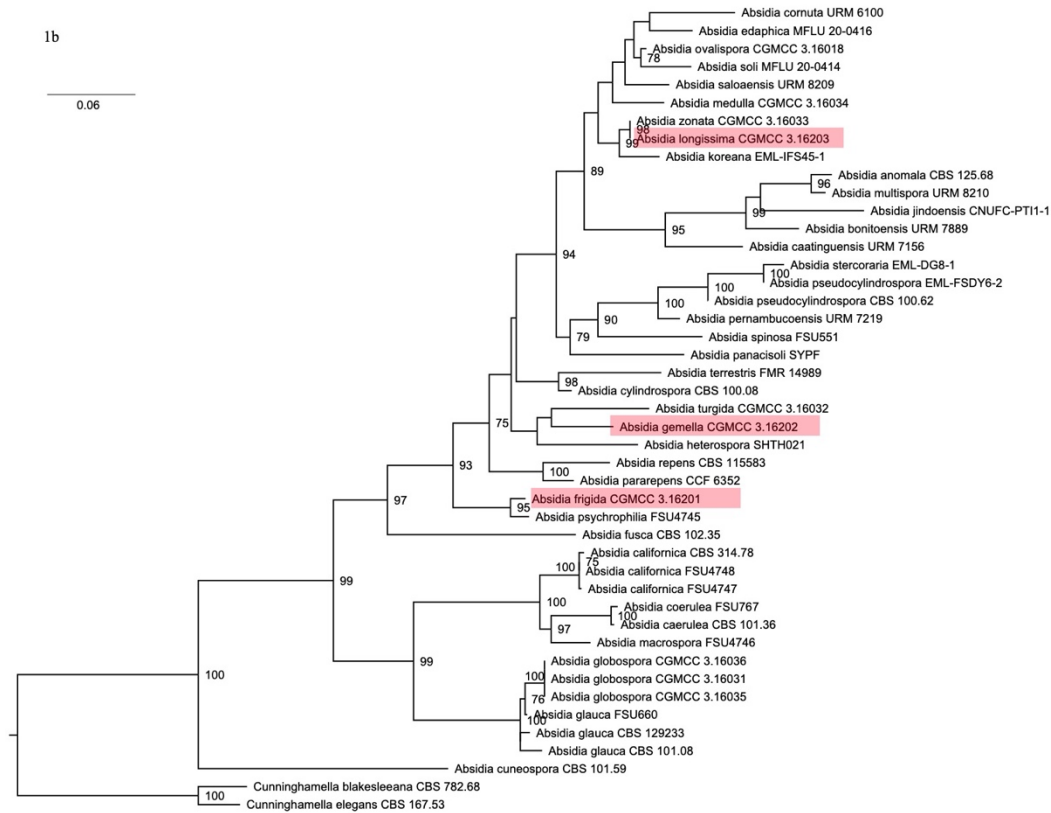

**Figure S1.** Maximum likelihood phylogenetic tree of *Absidia* based on ITS and LSU rDNA sequences, respectively, with *Cunninghamella elegans* and *C. blakesleeana* as outgroup. Maximum likelihood (ML) bootstrap values ( $\geq 70\%$ ) of each clade are indicated along branches. Scale bar in the upper left indicates substitutions per site.

**1a.** ML tree of ITS sequences, **1b.** ML tree of LSU rDNA sequences.

**Table S1.** Top hits for the new species based on BLAST search for ITS sequences from type materials.

| Query                  | Subject                                              | Query cover (%) | Percent identity (%) |
|------------------------|------------------------------------------------------|-----------------|----------------------|
| <i>Absidia frigida</i> | <i>A. psychrophilia</i> CBS 128.68                   | 100             | 88.78                |
|                        | <i>A. cylindrospora</i> var. <i>nigra</i> CBS 127.68 | 47              | 92.05                |
|                        | <i>A. healeyae</i> UoMAU1                            | 71              | 81.96                |
|                        | <i>A. edaphica</i> MFLUCC 20-0088                    | 41              | 91.44                |
|                        | <i>A. anomala</i> CBS 125.68                         | 40              | 94.79                |
| <i>A. gemella</i>      | <i>A. pernambucoensis</i> URM:7219                   | 60              | 85.68                |
|                        | <i>A. healeyae</i> UoMAU1                            | 64              | 84.37                |
|                        | <i>A. caatinguensis</i> URM 7156                     | 47              | 90.04                |
|                        | <i>A. soli</i> MFLUCC 20-0089                        | 34              | 93.58                |
|                        | <i>A. anomala</i> CBS 125.68                         | 39              | 89.52                |
| <i>A. longissima</i>   | <i>A. edaphica</i> MFLUCC 20-0088                    | 64              | 86.20                |
|                        | <i>A. soli</i> MFLUCC 20-0089                        | 47              | 91.25                |
|                        | <i>A. caatinguensis</i> URM 7156                     | 62              | 85.39                |
|                        | <i>A. montepascoalii</i> URM 8218                    | 56              | 86.77                |
|                        | <i>A. pernambucoensis</i> URM:7219                   | 39              | 94.95                |
